# Supplementary material for: Streamlined CRISPR genome engineering in wild-type bacteria using SIBR-Cas
Source: PubMed Central journal article supplement — Nucleic Acids Res. 2021 Oct 6;49(19):11392–404. doi: 10.1093/nar/gkab893 (PMC8565351; doi:10.1093/nar/gkab893), 2021-10-06
Supplement: gkab893_supplemental_file.pdf [file gkab893_supplemental_file.pdf]

## SUPPLEMENTARY DATA

### **Streamlined CRISPR genome engineering in wild-type bacteria using SIBR-Cas**

Constantinos Patinios<sup>1</sup>, Sjoerd C.A. Creutzburg<sup>1</sup>, Adini Q. Arifah<sup>1</sup>, Belén Adiego-Pérez<sup>1</sup>, Evans A. Gyimah<sup>1</sup>, Colin J. Ingham<sup>2</sup>, Servé W.M. Kengen<sup>1</sup>, John van der Oost<sup>1</sup>, Raymond H.J. Staals<sup>1\*</sup>

<sup>1</sup>Laboratory of Microbiology, Wageningen University and Research, Stippeneng 4, 6708 WE Wageningen, The Netherlands.

<sup>2</sup>Hoekmine Besloten Vennootschap, Kenniscentrum Technologie en Innovatie, Hogeschool Utrecht, 3584 CS, Utrecht, The Netherlands.

\*Corresponding author: Raymond H.J. Staals ([raymond.staals@wur.nl](mailto:raymond.staals@wur.nl))

#### **This PDF file includes:**

Supplementary Figures S1 to S10

Supplementary Tables S1 and S2

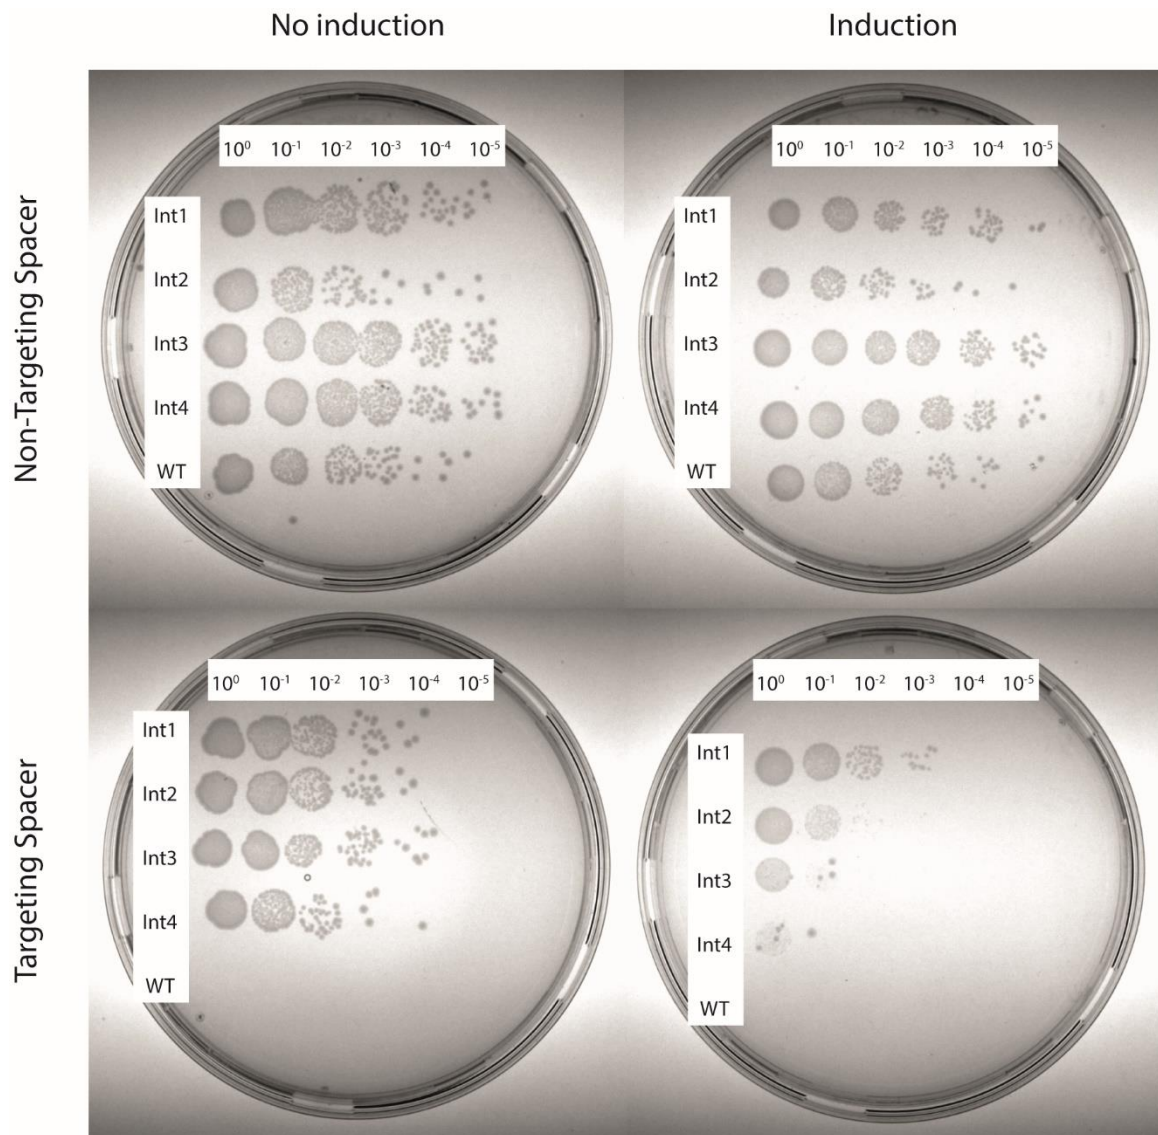

**Figure S1.** Raw data of SIBR-Cas targeting assay in *E. coli* MG1655. Four different SIBR-Cas variants (Int1-4; Int1 is the worst and Int4 is the best splicer) and the WT-*FnCas12a* were used for counter-selection by targeting *LacZ* with a targeting or a non-targeting spacer (Table S1). Transformants were serially diluted 5 times and plated on LB solid medium containing kanamycin ( $50 \text{ mg L}^{-1}$ ) in the presence or absence of the theophylline inducer (2 mM).

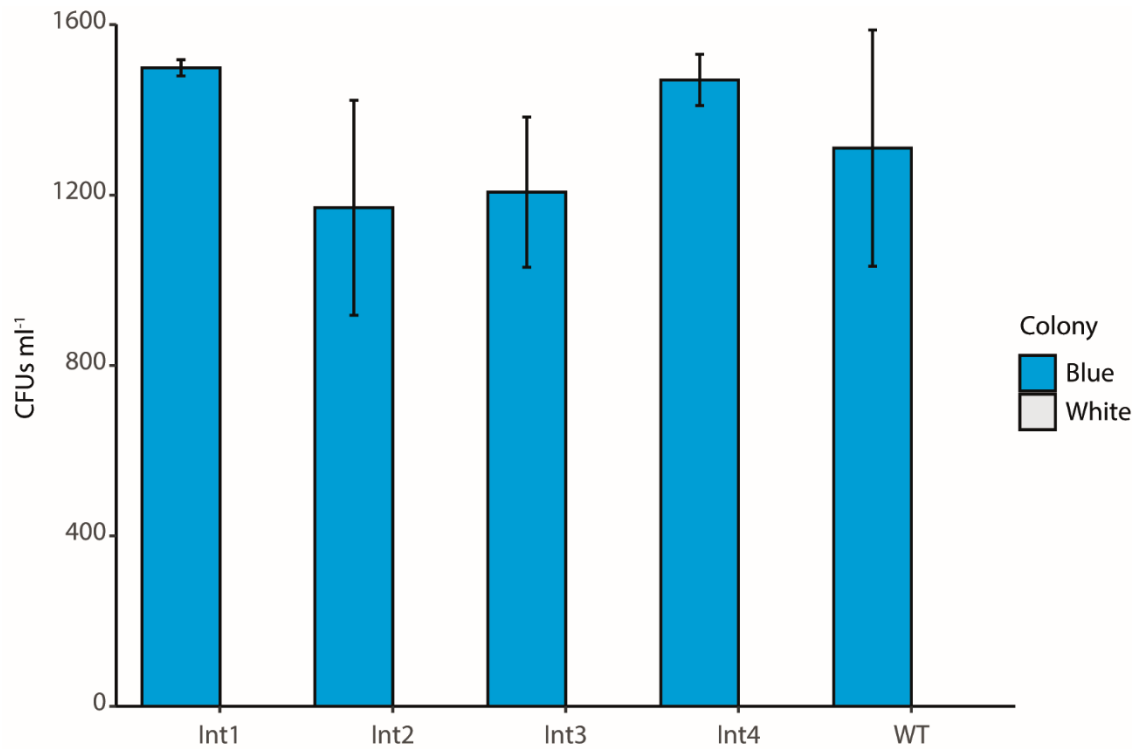

**Figure S2.** Blue/white colony screening of *E. coli* MG1655 transformed with plasmids containing non-targeting spacers. *E. coli* MG1655 was transformed with plasmids containing either of the four different SIBR-Cas variants (Int1-4; Int1 is the worst and Int4 is the best splicer) or the WT-*FnCas12a*, a non-targeting spacer and 500 bp homology arms to facilitate the knock-out of *LacZ* (Table S1). Values and error bars represent the means and s.d. of triplicate experiments.

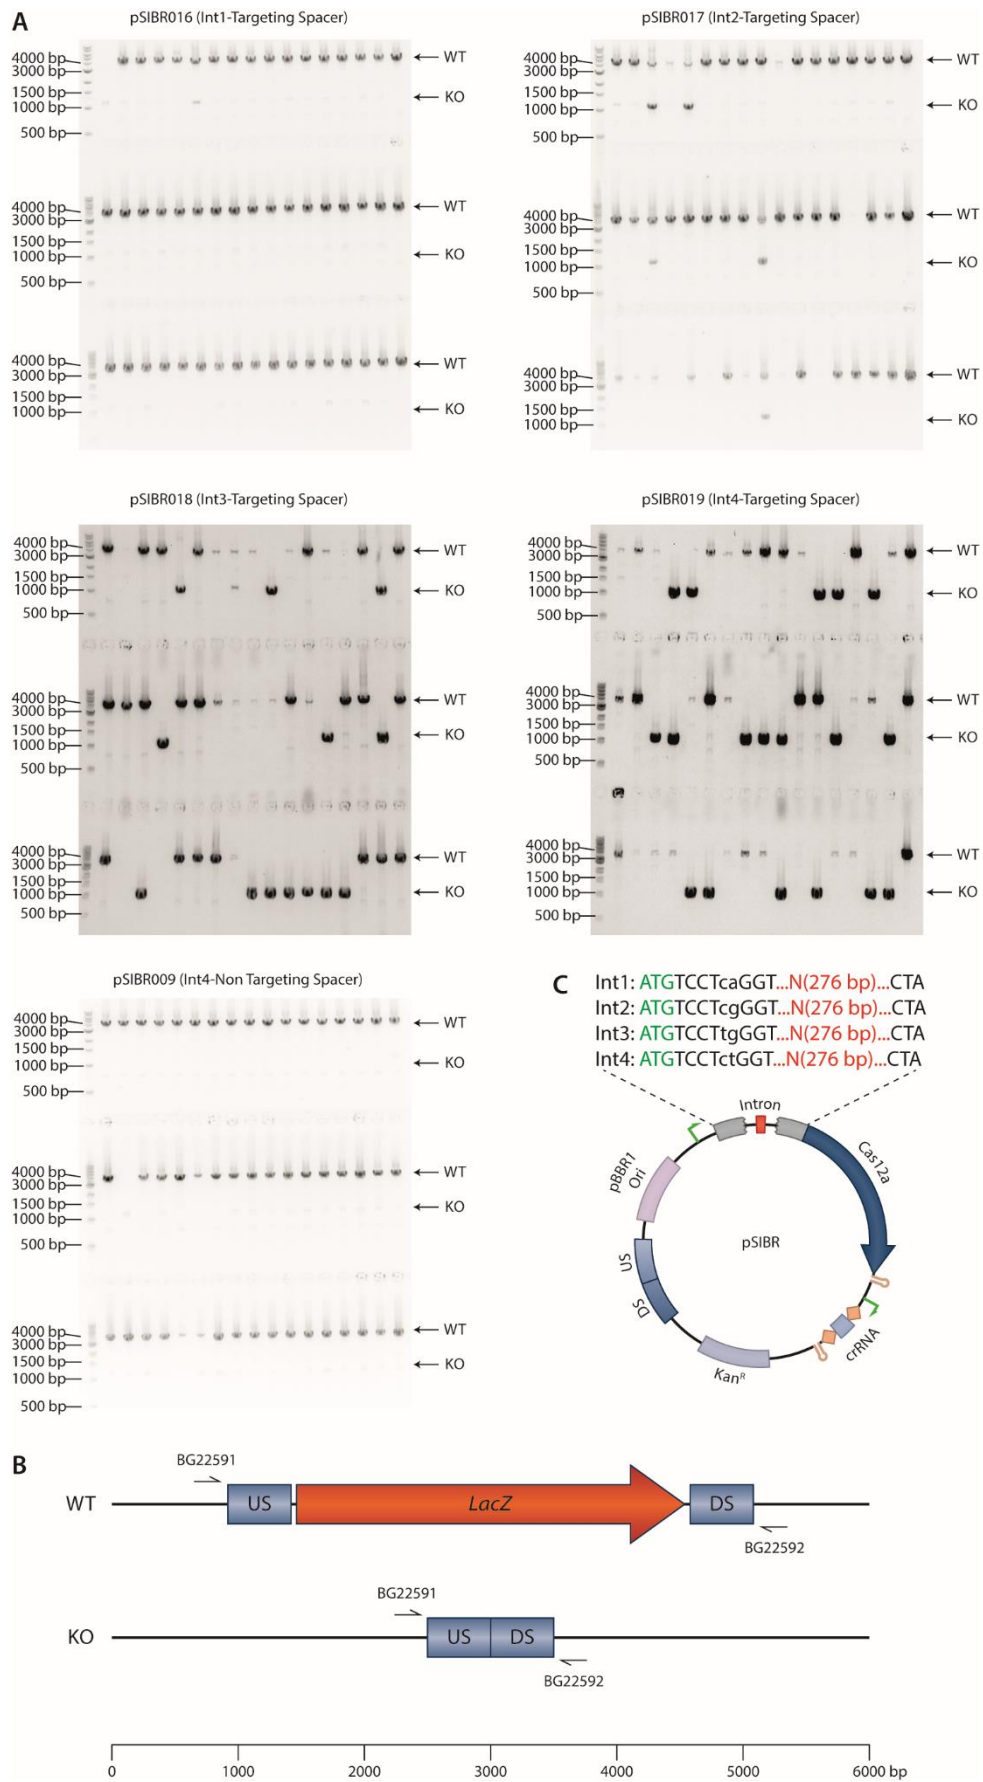

**Figure S3.** *LacZ* knock-out using SIBR-Cas. (A) *E. coli* MG1655 was transformed with plasmids containing either of the four different SIBR-Cas variants (Int1-4; Int1 is the worst and Int4 is the best splicer) or the WT-*FnCas12a*, a *LacZ* targeting or a non-targeting spacer and 500 bp homology arms to facilitate the knock-out of *LacZ* (Table S1). Each variant was performed in triplicate and 16 colonies (if present) were randomly selected from each replicate for colony PCR. The WT-*FnCas12a* variant targeting *LacZ* did not yield any colonies. The non-targeting variants were all WT and for this reason only Int4 is shown as a representative. Mix amplicons (WT and knock-out bands) were not counted for the total knock-out efficiency percentage. WT: 4229 bp, Knock-out (KO): 1154 bp. (B) Schematic representation of WT or edited (KO) *E. coli* MG1655 genome at the *LacZ* locus. BG22591 and BG22592 represent the primers used for PCR (Table S2). (C) Schematic representation of the pSIBR plasmids used to knock-out *LacZ*. Int1-4 represent the four different SIBR-Cas variants and their sequence difference is depicted with lowercase nucleotide letters.

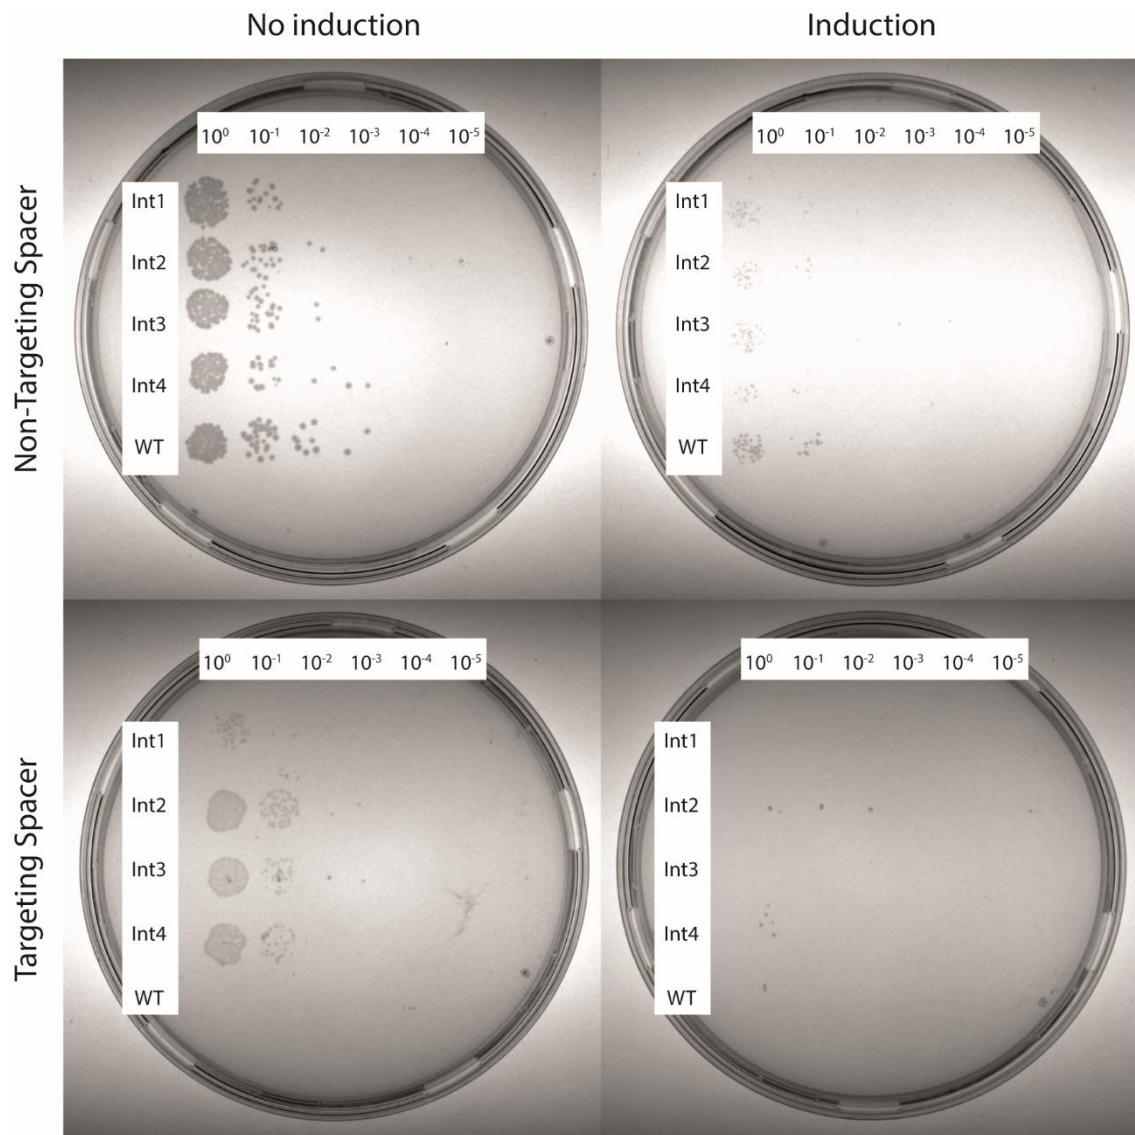

**Figure S4.** Raw data of SIBR-Cas targeting assay in *P. putida* KT2440. Either of the four different SIBR-Cas variants (Int1-4; Int1 is the worst and Int4 is the best splicer) or the WT-*FnCas12a* were used for counter-selection by targeting *EndA* with a targeting or a non-targeting spacer (Table S1). Transformants were serially diluted 5 times and plated on LB medium containing kanamycin ( $50 \text{ mg L}^{-1}$ ) in the presence or absence of the theophylline inducer (2 mM).

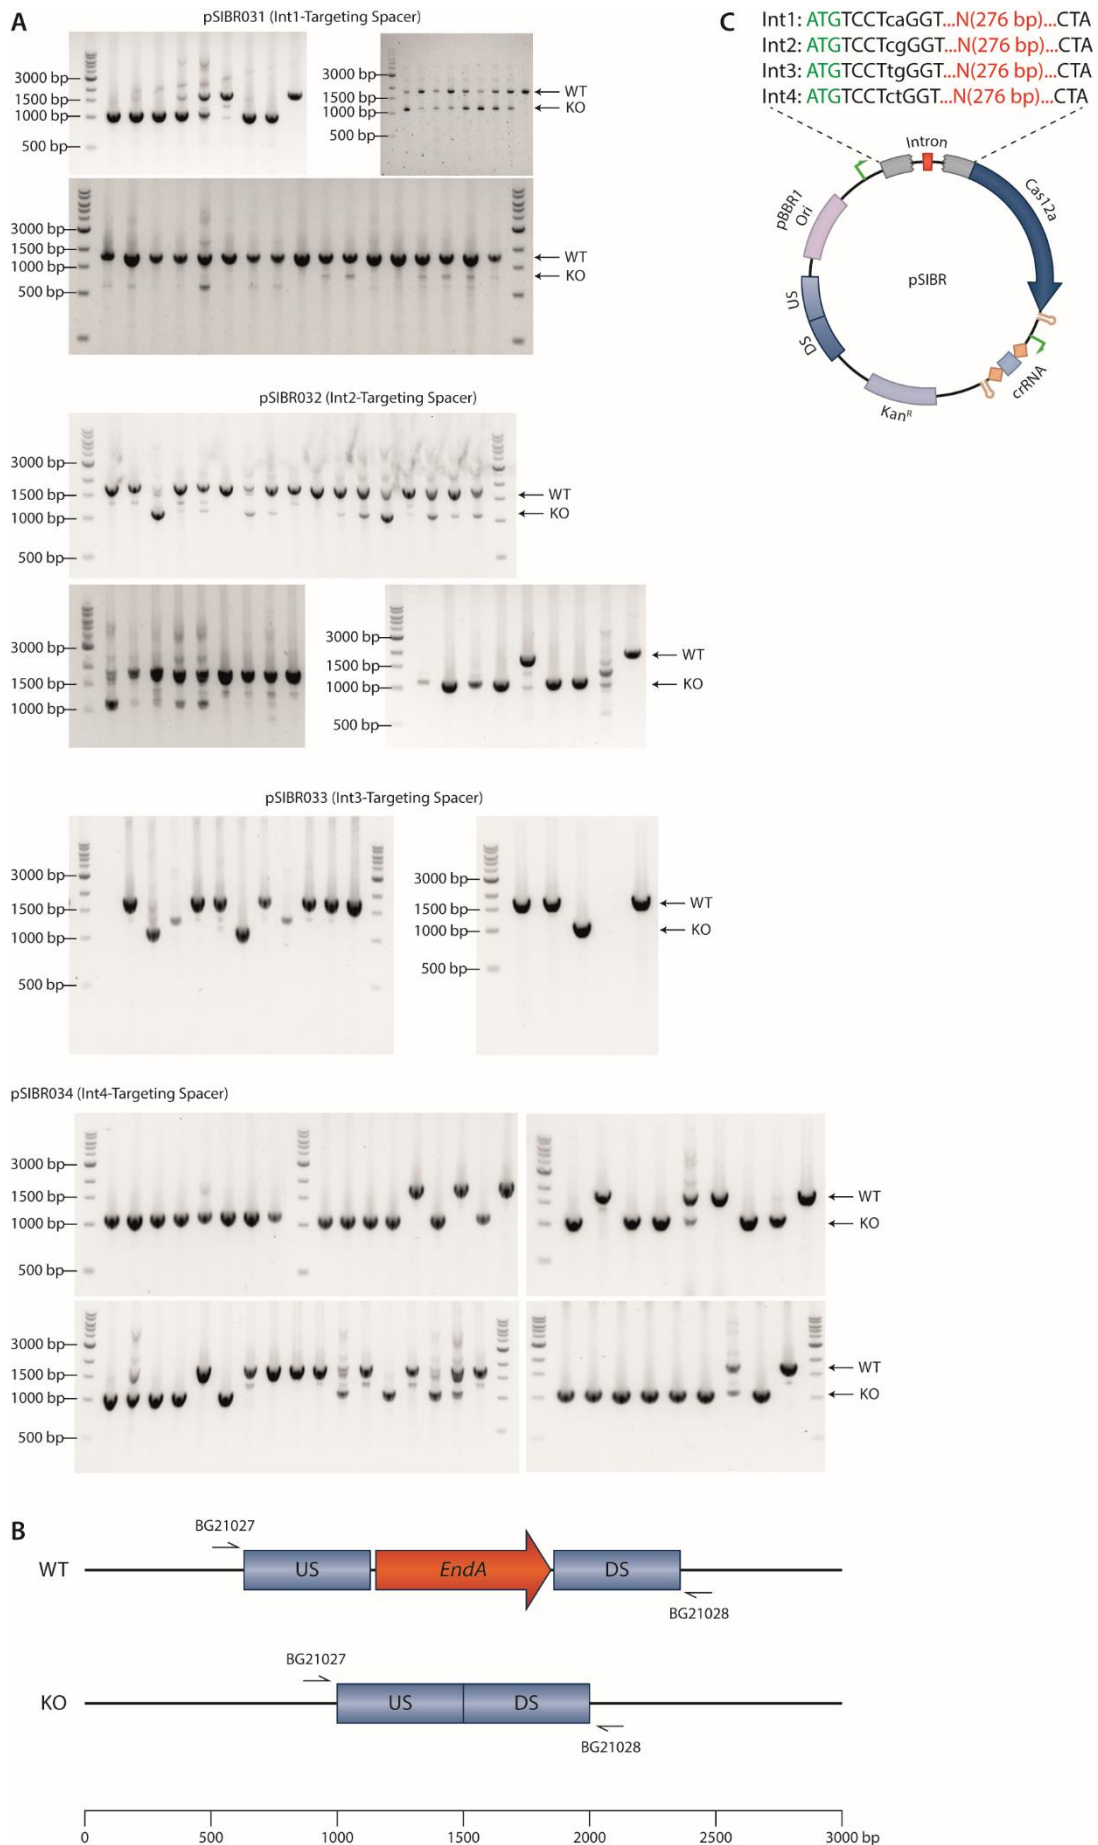

**Figure S5.** *EndA* knock-out using SIBR-Cas. **(A)** *P. putida* KT2440 was transformed with plasmids containing either of the four different SIBR-Cas variants (Int1-4; Int1 is the worst and Int4 is the best splicer) or the WT-*FnCas12a*, an *EndA* targeting spacer and 500 bp homology arms to facilitate the knock-out of *EndA* (Table S1). Each variant was performed in triplicate and 16 colonies (if present) were randomly selected from each replicate for colony PCR. The WT-*FnCas12a* variant targeting *EndA* did not yield any colonies. Mix amplicons (WT and knock-out bands) were not counted for the total knock-out efficiency percentage. WT: 1814 bp, Knock-out (KO): 1121 bp. **(B)** Schematic representation of WT or edited (KO) *P. putida* KT2440 genome at the *EndA* locus. BG21027 and BG21028 represent the primers used for PCR (Table S2). **(C)** Schematic representation of the pSIBR plasmids used to knock-out *EndA*. Int1-4 represent the four different SIBR-Cas variants and their sequence difference is depicted with lowercase nucleotide letters.



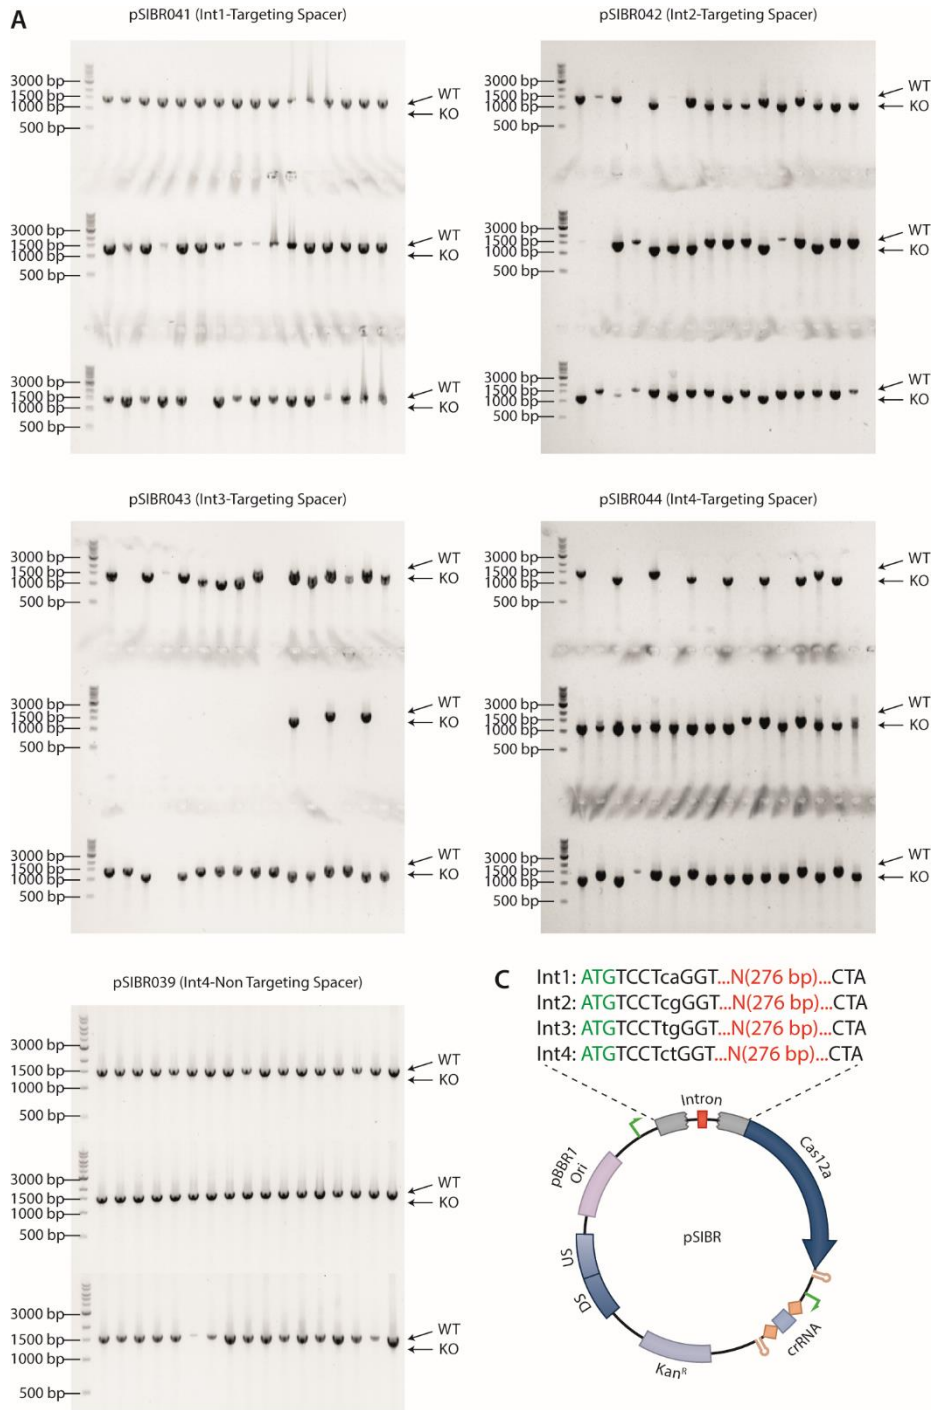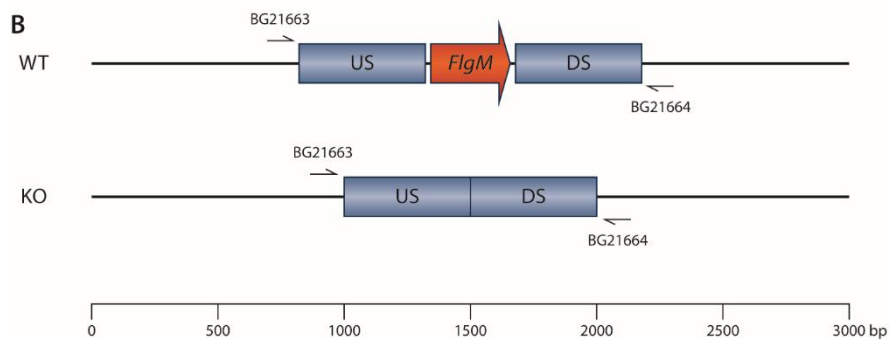

**Figure S6.** *FlgM* knock-out using SIBR-Cas. (A) *P. putida* KT2440 was transformed with plasmids containing either of the four different SIBR-Cas variants (Int1-4; Int1 is the worst and Int4 is the best splicer) or the WT-*FnCas12a*, an *FlgM* targeting or a non-targeting spacer and 500 bp homology arms to facilitate the knock-out of *FlgM* (Table S1). Each variant was performed in triplicate and 16 colonies (if present) were randomly selected from each replicate for colony PCR. The WT-*FnCas12a* variant targeting *FlgM* did not yield any colonies. The non-targeting variants were all WT and for this reason only Int4 is shown as a representative. Mix amplicons (WT and knock-out bands) were not counted for the total knock-out efficiency percentage. WT: 1523 bp, Knock-out (KO): 1208 bp. (B) Schematic representation of WT or edited (KO) *P. putida* KT2440 genome at the *FlgM* locus. BG21663 and BG21664 represent the primers used for PCR (Table S2). (C) Schematic representation of the pSIBR plasmids used to knock-out *FlgM*. Int1-4 represent the four different SIBR-Cas variants and their sequence difference is depicted with lowercase nucleotide letters.

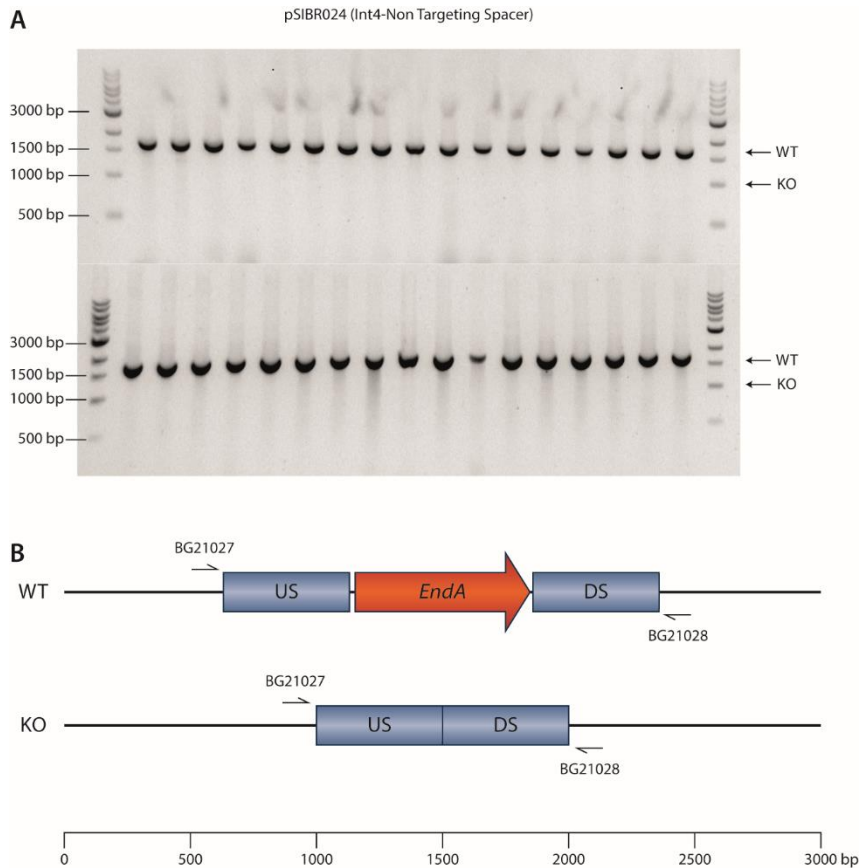

**Figure S7.** *EndA* knock-out using non-targeting SIBR-Cas. **(A)** *P. putida* KT2440 was transformed with plasmids containing either of the four different SIBR-Cas variants (Int1-4; Int1 is the worst and Int4 is the best splicer) or the WT-*FnCas12a*, an *EndA* non-targeting spacer and 500 bp homology arms to facilitate the knock-out of *EndA* (Table S1). Each variant was performed in triplicate and 16 colonies (if present) were randomly selected from each replicate for colony PCR. All variants were WT and for this reason only the Int4 is shown as a representative. WT: 1814 bp, Knock-out (KO): 1121 bp. **(B)** Schematic representation of WT or edited (KO) *P. putida* KT2440 genome at the *EndA* locus. BG21027 and BG21028 represent the primers used for PCR (Table S2).

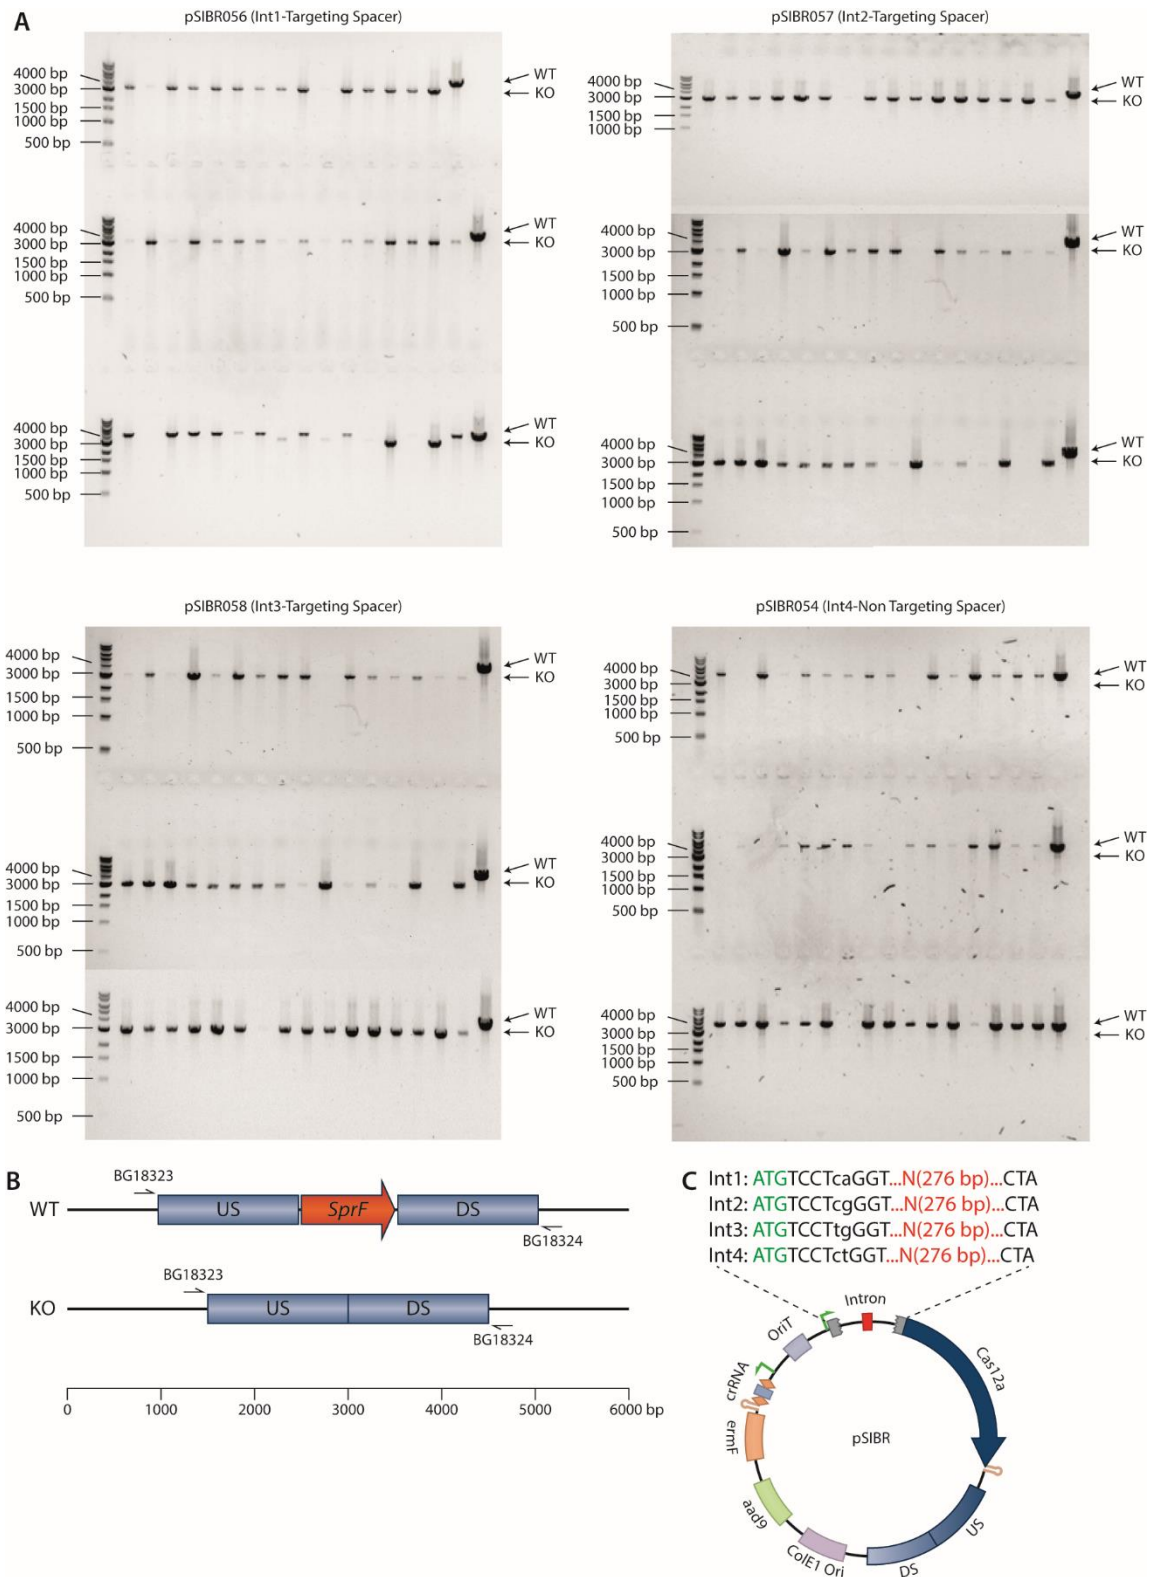

**Figure S8.** *SprF* knock-out using SIBR-Cas. **(A)** *Flavobacterium* IR1 was transformed with plasmids containing either of the four different SIBR-Cas variants (Int1-4; Int1 is the worst

and Int4 is the best splicer) or the WT-*FnCas12a*, an *SprF* targeting or a non-targeting spacer and 1500 bp homology arms to facilitate the knock-out of *SprF* (Table S1). Each variant was performed in triplicate and 16 colonies (if present) were randomly selected from each replicate for colony PCR. The Int4 and WT-*FnCas12a* variants targeting *SprF* did not yield any colonies. The non-targeting variants were all WT and for this reason only Int4 is shown as a representative. Mix amplicons (WT and knock-out bands) were not counted for the total knock-out efficiency percentage. WT: 4081 bp, Knock-out (KO): 3082 bp. **(B)** Schematic representation of WT or edited (KO) *Flavobacterium* IR1 genome at the *SprF* locus. BG18323 and BG18324 represent the primers used for PCR (Table S2). **(C)** Schematic representation of the pSIBR plasmids used to knock-out *SprF*. Int1-4 represent the four different SIBR-Cas variants and their sequence difference is depicted with lowercase nucleotide letters.

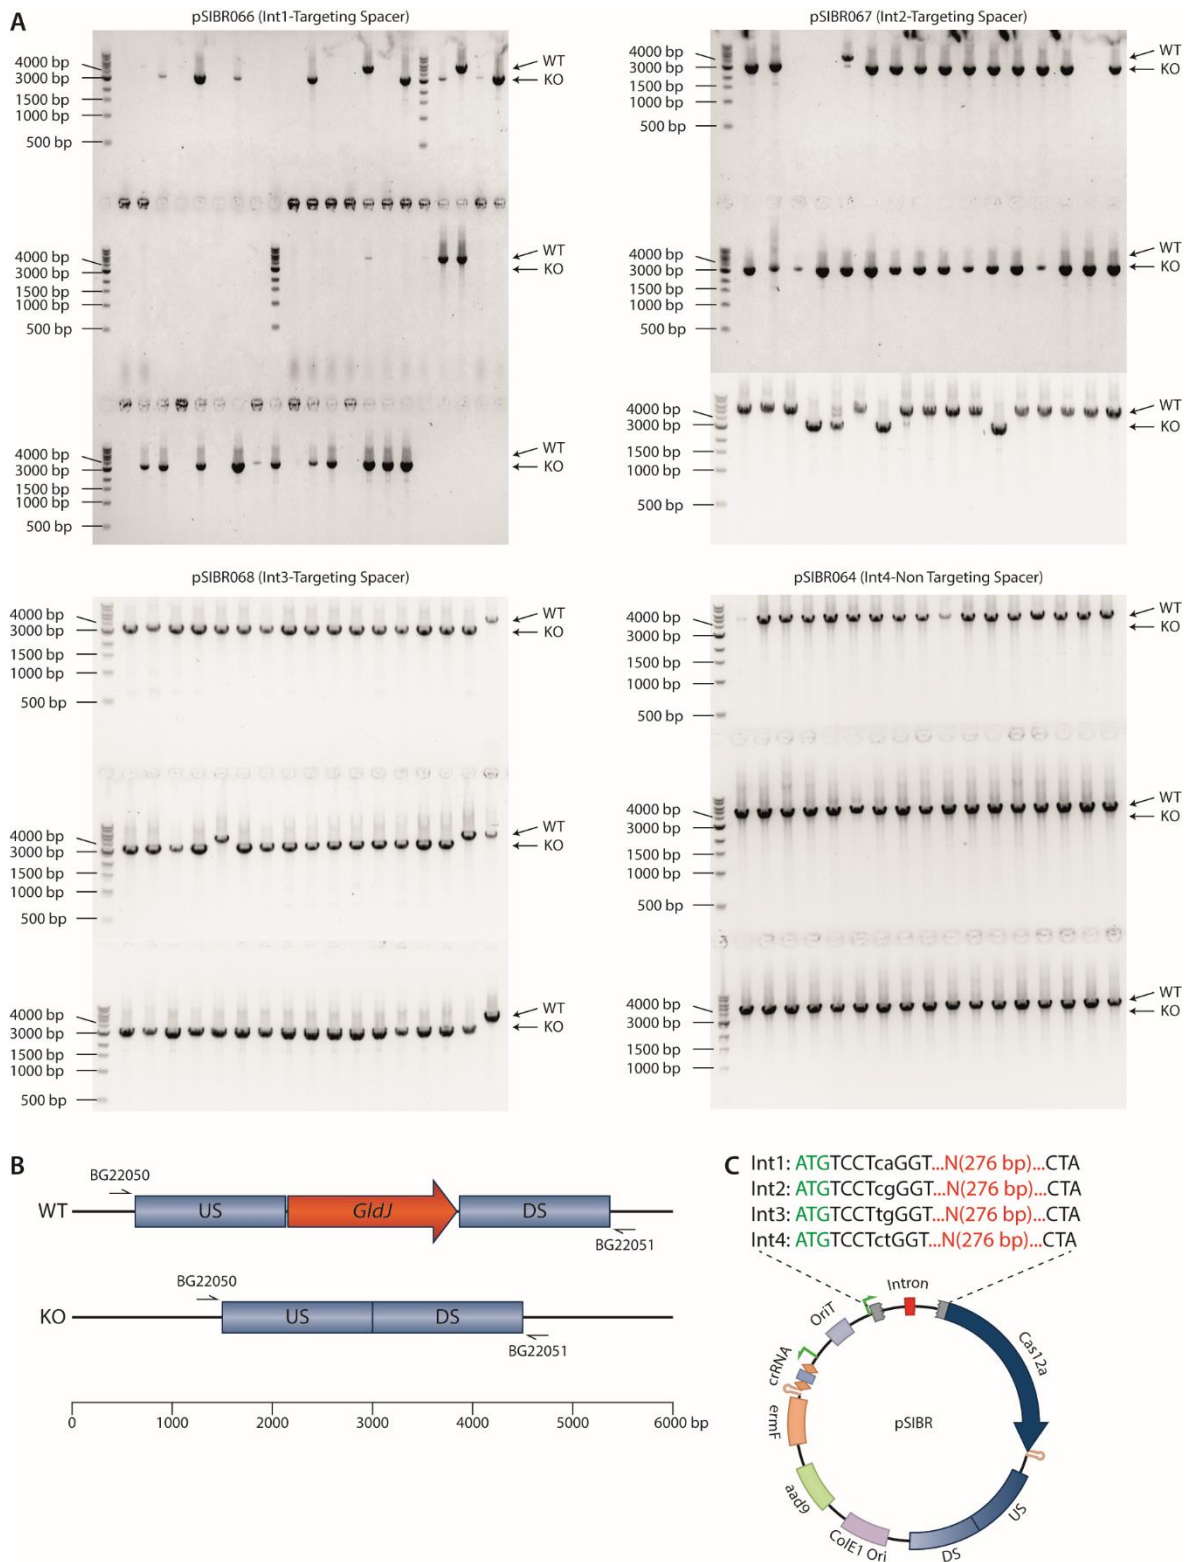

**Figure S9.** *GldJ* knock-out using SIBR-Cas. **(A)** *Flavobacterium* IR1 was transformed with plasmids containing either of the four different SIBR-Cas variants (Int1-4; Int1 is the worst

and Int4 is the best splicer) or the WT-*FnCas12a*, a *GldJ* targeting or a non-targeting spacer and 1500 bp homology arms to facilitate the knock-out of *GldJ* (Table S1). Each variant was performed in triplicate and 16 colonies (if present) were randomly selected from each replicate for colony PCR. The Int4 and WT-*FnCas12a* variants targeting *GldJ* did not yield any colonies. The non-targeting variants were all WT and for this reason only the Int4 is shown as a representative. Mix amplicons (WT and knock-out bands) were not counted for the total knock-out efficiency percentage. WT: 4944 bp, Knock-out (KO): 3255 bp. **(B)** Schematic representation of WT or edited (KO) *Flavobacterium* IR1 genome at the *GldJ* locus. BG22050 and BG22051 represent the primers used for PCR (Table S2). **(C)** Schematic representation of the pSIBR plasmids used to knock-out *GldJ*. Int1-4 represent the four different SIBR-Cas variants and their sequence difference is depicted with lowercase nucleotide letters.

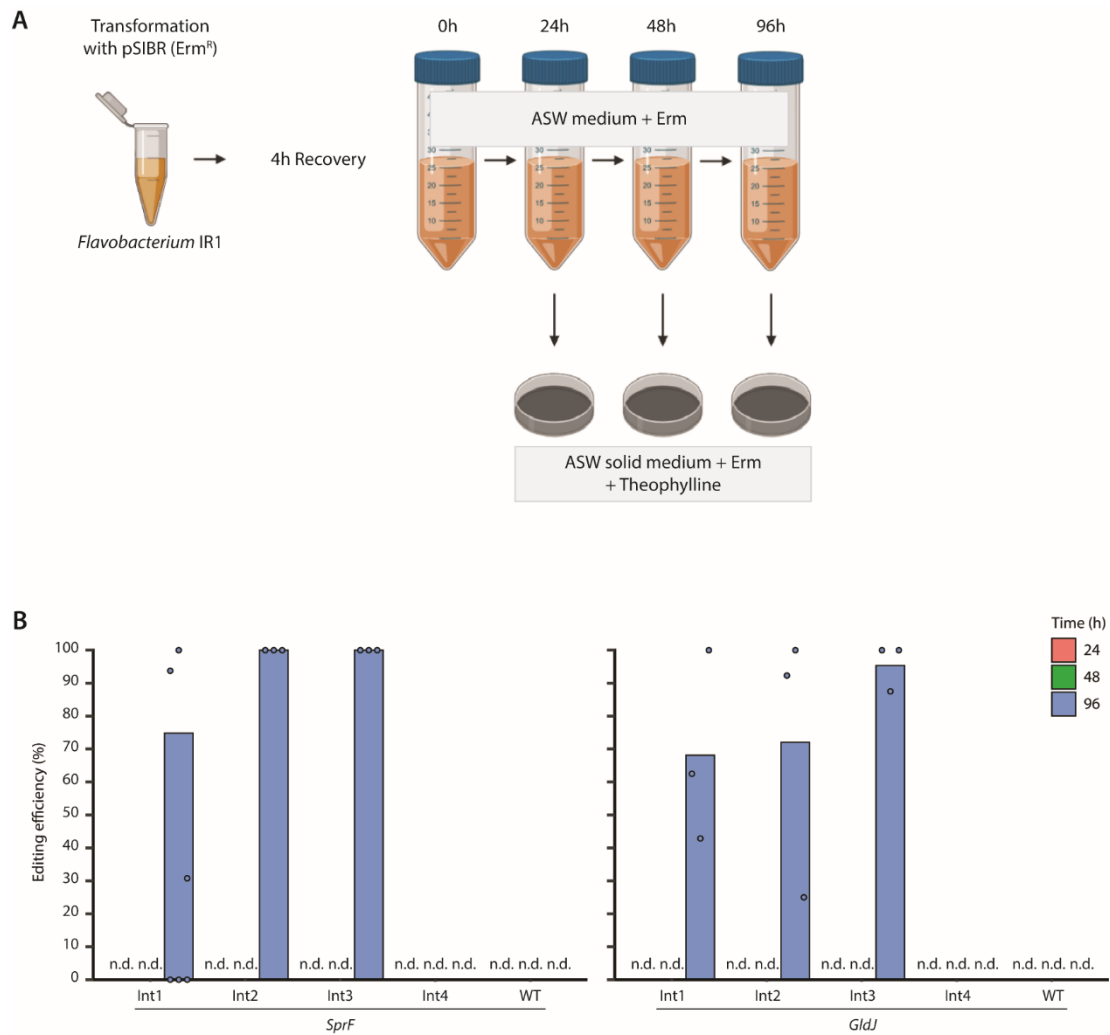

**Figure S10.** *SprF* and *GldJ* knock-out in *Flavobacterium* IR1 using SIBR-Cas and following a 96 h incubation approach. **(A)** Schematic representation of the 96 h incubation approach. After transformation of *Flavobacterium* IR1 with plasmids containing either of the four different SIBR-Cas variants (Int1-4; Int1 is the worst and Int4 is the best splicer) or the WT-*FnCas12a*, an *SprF* or a *GldJ* targeting spacer and 1500 bp homology arms to facilitate either the knock-out of *SprF* or *GldJ* (Table S1), cells were recovered for 4 hours at 30°C in 1 mL ASW medium. After recovery, the cells were transferred in 10 mL ASW medium containing erythromycin (Erm; 200 mg L<sup>-1</sup>) and incubated for 96 hours. 1 mL of culture was recovered at 24, 48 and 96 hours of incubation, centrifuged to remove excess medium and plated on ASW agar containing erythromycin (200 mg L<sup>-1</sup>) and the theophylline inducer (2 mM). This image was created using BioRender.com. **(B)** Editing efficiency of *SprF* and *GldJ* genes in



*Flavobacterium* IR1 following the 96 h incubation approach as indicated in (A). Colonies were obtained only at 96 hours (blue bars) after transformation and the editing efficiency of the biological triplicates is represented with a blue dot. 24 hours (red bars) and 48 hours (green bars) of incubation did not yield any colonies. Int1 to Int4 represent the four Intron-*FnCas12a* variants and WT represents the WT *FnCas12a* gene. N.d., not determined.

**Table S1.** Plasmids used in this study.

| Plasmid name                                                   | Description and relevant characteristics                                                      | Reference  | Plasmid map (Benchling link)                                                                                    |
|----------------------------------------------------------------|-----------------------------------------------------------------------------------------------|------------|-----------------------------------------------------------------------------------------------------------------|
| <b>LacZ assays in <i>E. coli</i></b>                           |                                                                                               |            |                                                                                                                 |
| pEA001 [-7W]                                                   | KanR, lacUV5p-[-7W] Intron-LacZ                                                               | This study | <a href="https://benchling.com/s/seq-b29hHw7mAwS9wCC9XjSh">https://benchling.com/s/seq-b29hHw7mAwS9wCC9XjSh</a> |
| pEA001 [-7M]                                                   | KanR, lacUV5p-[-7M] Intron-LacZ                                                               | This study | <a href="https://benchling.com/s/seq-b29hHw7mAwS9wCC9XjSh">https://benchling.com/s/seq-b29hHw7mAwS9wCC9XjSh</a> |
| pEA001 [PPP]                                                   | KanR, lacUV5p-PPP Intron-LacZ                                                                 | This study | <a href="https://benchling.com/s/seq-TaewzYsGuJPgQQIUMGWK">https://benchling.com/s/seq-TaewzYsGuJPgQQIUMGWK</a> |
| pEA001 [PPW]                                                   | KanR, lacUV5p-PPW Intron-LacZ                                                                 | This study | <a href="https://benchling.com/s/seq-EOkis573cMPYC19kMe1K">https://benchling.com/s/seq-EOkis573cMPYC19kMe1K</a> |
| pEA001 [PPM]                                                   | KanR, lacUV5p-PPM Intron-LacZ                                                                 | This study | <a href="https://benchling.com/s/seq-WoEO8dYbzWWEfgP4YHZ3">https://benchling.com/s/seq-WoEO8dYbzWWEfgP4YHZ3</a> |
| pEA001 [PWP]                                                   | KanR, lacUV5p-PWP Intron-LacZ                                                                 | This study | <a href="https://benchling.com/s/seq-v5xeWzkey7xqyDVz049D">https://benchling.com/s/seq-v5xeWzkey7xqyDVz049D</a> |
| pEA001 [PWW]                                                   | KanR, lacUV5p-PWW Intron-LacZ                                                                 | This study | <a href="https://benchling.com/s/seq-fyuHmtaqQ1frgrXSHLTI">https://benchling.com/s/seq-fyuHmtaqQ1frgrXSHLTI</a> |
| pEA001 [PWM]                                                   | KanR, lacUV5p-PWM Intron-LacZ                                                                 | This study | <a href="https://benchling.com/s/seq-FCyiOnKpcH9rjLCKPBuQ">https://benchling.com/s/seq-FCyiOnKpcH9rjLCKPBuQ</a> |
| pEA001 [PMP]                                                   | KanR, lacUV5p-PMP Intron-LacZ                                                                 | This study | <a href="https://benchling.com/s/seq-lTxfhMijvaKJqg160zNT">https://benchling.com/s/seq-lTxfhMijvaKJqg160zNT</a> |
| pEA001 [PMW]                                                   | KanR, lacUV5p-PMW Intron-LacZ                                                                 | This study | <a href="https://benchling.com/s/seq-JPwy5FGBvEske2GVbv7P">https://benchling.com/s/seq-JPwy5FGBvEske2GVbv7P</a> |
| pEA001 [PMM]                                                   | KanR, lacUV5p-PMM Intron-LacZ                                                                 | This study | <a href="https://benchling.com/s/seq-x3TLolbNNgfV2YQiINRY">https://benchling.com/s/seq-x3TLolbNNgfV2YQiINRY</a> |
| pEA001 [MPP]                                                   | KanR, lacUV5p-MPP Intron-LacZ                                                                 | This study | <a href="https://benchling.com/s/seq-0XyIkf8SqsFB5t8M1R17">https://benchling.com/s/seq-0XyIkf8SqsFB5t8M1R17</a> |
| pEA001 [MPW]                                                   | KanR, lacUV5p-MPW Intron-LacZ                                                                 | This study | <a href="https://benchling.com/s/seq-6WHDEIHCNkgJwg9QMgko">https://benchling.com/s/seq-6WHDEIHCNkgJwg9QMgko</a> |
| pEA001 [MPM]                                                   | KanR, lacUV5p-MPM Intron-LacZ                                                                 | This study | <a href="https://benchling.com/s/seq-8Pv9l5IdfQDM4uE9mEsk">https://benchling.com/s/seq-8Pv9l5IdfQDM4uE9mEsk</a> |
| pEA001 [MPW]                                                   | KanR, lacUV5p-MPW Intron-LacZ                                                                 | This study | <a href="https://benchling.com/s/seq-6WHDEIHCNkgJwg9QMgko">https://benchling.com/s/seq-6WHDEIHCNkgJwg9QMgko</a> |
| pEA001 [MWW]                                                   | KanR, lacUV5p-MWW Intron-LacZ                                                                 | This study | <a href="https://benchling.com/s/seq-o5RmITaeke7KfC26ucN2">https://benchling.com/s/seq-o5RmITaeke7KfC26ucN2</a> |
| pEA001 [MWM]                                                   | KanR, lacUV5p-MWM Intron-LacZ                                                                 | This study | <a href="https://benchling.com/s/seq-LXTAIKbOkh0LkUtwS6jN">https://benchling.com/s/seq-LXTAIKbOkh0LkUtwS6jN</a> |
| pEA001 [MMP]                                                   | KanR, lacUV5p-MMP Intron-LacZ                                                                 | This study | <a href="https://benchling.com/s/seq-5tcNZAVJGT4y9edfAQ45">https://benchling.com/s/seq-5tcNZAVJGT4y9edfAQ45</a> |
| pEA001 [MMW]                                                   | KanR, lacUV5p-MMW Intron-LacZ                                                                 | This study | <a href="https://benchling.com/s/seq-ZA7JveYYuPSFZYHL6R14">https://benchling.com/s/seq-ZA7JveYYuPSFZYHL6R14</a> |
| pEA001 [MMM]                                                   | KanR, lacUV5p-MMM Intron-LacZ                                                                 | This study | <a href="https://benchling.com/s/seq-eTGayMzfAzP8rWzB6bGF">https://benchling.com/s/seq-eTGayMzfAzP8rWzB6bGF</a> |
| pEA001 [296P]                                                  | KanR, lacUV5p-[+296P] Intron-LacZ                                                             | This study | <a href="https://benchling.com/s/seq-r1rCLMW5YYzhYZQMnFu0">https://benchling.com/s/seq-r1rCLMW5YYzhYZQMnFu0</a> |
| pEA001 [296W]                                                  | KanR, lacUV5p-[+296W] Intron-LacZ                                                             | This study | <a href="https://benchling.com/s/seq-7WTrwg0RE4wBvLycHil7">https://benchling.com/s/seq-7WTrwg0RE4wBvLycHil7</a> |
| <b>SIBR-Cas targeting and editing in <i>E. coli</i> MG1655</b> |                                                                                               |            |                                                                                                                 |
| pSIBR001                                                       | KanR, lacUV5p-Int1-FnCas12a-B1002t, lacUV5p-NT spacer-B1002t                                  | This study | <a href="https://benchling.com/s/seq-6nB5lmpoZV4i4MGsFa08">https://benchling.com/s/seq-6nB5lmpoZV4i4MGsFa08</a> |
| pSIBR002                                                       | KanR, lacUV5p-Int2-FnCas12a-B1002t, lacUV5p-NT spacer-B1002t                                  | This study | <a href="https://benchling.com/s/seq-HqscmCgFky18So0ILu4H">https://benchling.com/s/seq-HqscmCgFky18So0ILu4H</a> |
| pSIBR003                                                       | KanR, lacUV5p-Int3-FnCas12a-B1002t, lacUV5p-NT spacer-B1002t                                  | This study | <a href="https://benchling.com/s/seq-ITK2KqCHU1tu7RRdTM7z">https://benchling.com/s/seq-ITK2KqCHU1tu7RRdTM7z</a> |
| pSIBR004                                                       | KanR, lacUV5p-Int4-FnCas12a-B1002t, lacUV5p-NT spacer-B1002t                                  | This study | <a href="https://benchling.com/s/seq-ynITp7uQfMxAc3ozptCF">https://benchling.com/s/seq-ynITp7uQfMxAc3ozptCF</a> |
| pSIBR005                                                       | KanR, lacUV5p-WT FnCas12a-B1002t, lacUV5p-NT spacer-B1002t                                    | This study | <a href="https://benchling.com/s/seq-oMUyGhIUeozuKBZAw4jc">https://benchling.com/s/seq-oMUyGhIUeozuKBZAw4jc</a> |
| pSIBR006                                                       | KanR, lacUV5p-Int1-FnCas12a-B1002t, lacUV5p-NT spacer-B1002t, 500 bp homologous arms for LacZ | This study | <a href="https://benchling.com/s/seq-KfOvLIHpPQ3Nc3Letvi2">https://benchling.com/s/seq-KfOvLIHpPQ3Nc3Letvi2</a> |
| pSIBR007                                                       | KanR, lacUV5p-Int2-FnCas12a-B1002t, lacUV5p-NT spacer-B1002t, 500 bp homologous arms for LacZ | This study | <a href="https://benchling.com/s/seq-A9yxFE6tM147TxLnuBp5">https://benchling.com/s/seq-A9yxFE6tM147TxLnuBp5</a> |
| pSIBR008                                                       | KanR, lacUV5p-Int3-FnCas12a-B1002t, lacUV5p-NT spacer-B1002t, 500 bp homologous arms for LacZ | This study | <a href="https://benchling.com/s/seq-GsV7JDjZCptXs74ru8KP">https://benchling.com/s/seq-GsV7JDjZCptXs74ru8KP</a> |
| pSIBR009                                                       | KanR, lacUV5p-Int4-FnCas12a-B1002t, lacUV5p-NT spacer-B1002t, 500 bp homologous arms for LacZ | This study | <a href="https://benchling.com/s/seq-bOnvk6U3KpdodrtOdwqa">https://benchling.com/s/seq-bOnvk6U3KpdodrtOdwqa</a> |
| pSIBR010                                                       | KanR, lacUV5p-WT FnCas12a-B1002t, lacUV5p-NT spacer-B1002t, 500 bp homologous arms for LacZ   | This study | <a href="https://benchling.com/s/seq-UfbGPfRlByNQMPfIRQgf">https://benchling.com/s/seq-UfbGPfRlByNQMPfIRQgf</a> |
| pSIBR011                                                       | KanR, lacUV5p-Int1-FnCas12a-B1002t, lacUV5p-LacZ spacer-B1002t                                | This study | <a href="https://benchling.com/s/seq-uiQtuVeqvz5zjF7z0ny3">https://benchling.com/s/seq-uiQtuVeqvz5zjF7z0ny3</a> |
| pSIBR012                                                       | KanR, lacUV5p-Int2-FnCas12a-B1002t,                                                           | This study | <a href="https://benchling.com/s/seq-JQKbacNlyWpi8euHvm">https://benchling.com/s/seq-JQKbacNlyWpi8euHvm</a>     |

|                                                                  |                                                                                                 |            |                                                                                                                 |
|------------------------------------------------------------------|-------------------------------------------------------------------------------------------------|------------|-----------------------------------------------------------------------------------------------------------------|
|                                                                  | lacUV5p-LacZ spacer-B1002t                                                                      |            |                                                                                                                 |
| pSIBR013                                                         | KanR, lacUV5p-Int3-FnCas12a-B1002t, lacUV5p-LacZ spacer-B1002t                                  | This study | <a href="https://benchling.com/s/seq-ylKKtgjKF6DIFbcDwHCQ">https://benchling.com/s/seq-ylKKtgjKF6DIFbcDwHCQ</a> |
| pSIBR014                                                         | KanR, lacUV5p-Int4-FnCas12a-B1002t, lacUV5p-LacZ spacer-B1002t                                  | This study | <a href="https://benchling.com/s/seq-fkln1V3COjxwQkzR99Tn">https://benchling.com/s/seq-fkln1V3COjxwQkzR99Tn</a> |
| pSIBR015                                                         | KanR, lacUV5p-WT FnCas12a-B1002t, lacUV5p-LacZ spacer-B1002t                                    | This study | <a href="https://benchling.com/s/seq-uT1YvCJDtZK0T3ZV9Tsz">https://benchling.com/s/seq-uT1YvCJDtZK0T3ZV9Tsz</a> |
| pSIBR016                                                         | KanR, lacUV5p-Int1-FnCas12a-B1002t, lacUV5p-LacZ spacer-B1002t, 500 bp homologous arms for LacZ | This study | <a href="https://benchling.com/s/seq-2zEd9FIQA0I1iAMMtng9">https://benchling.com/s/seq-2zEd9FIQA0I1iAMMtng9</a> |
| pSIBR017                                                         | KanR, lacUV5p-Int2-FnCas12a-B1002t, lacUV5p-LacZ spacer-B1002t, 500 bp homologous arms for LacZ | This study | <a href="https://benchling.com/s/seq-7KxCoxBOjFf115JKPY0V">https://benchling.com/s/seq-7KxCoxBOjFf115JKPY0V</a> |
| pSIBR018                                                         | KanR, lacUV5p-Int3-FnCas12a-B1002t, lacUV5p-LacZ spacer-B1002t, 500 bp homologous arms for LacZ | This study | <a href="https://benchling.com/s/seq-uyyUS1G1D8LGq0CXwdIO">https://benchling.com/s/seq-uyyUS1G1D8LGq0CXwdIO</a> |
| pSIBR019                                                         | KanR, lacUV5p-Int4-FnCas12a-B1002t, lacUV5p-LacZ spacer-B1002t, 500 bp homologous arms for LacZ | This study | <a href="https://benchling.com/s/seq-fAPkx41fFWhXfMxP33Bp">https://benchling.com/s/seq-fAPkx41fFWhXfMxP33Bp</a> |
| pSIBR020                                                         | KanR, lacUV5p-WT FnCas12a-B1002t, lacUV5p-LacZ spacer-B1002t, 500 bp homologous arms for LacZ   | This study | <a href="https://benchling.com/s/seq-HL3kNsN2thXzkaSbBCuY">https://benchling.com/s/seq-HL3kNsN2thXzkaSbBCuY</a> |
| <b>SIBR-Cas targeting and editing in <i>P. putida</i> KT2440</b> |                                                                                                 |            |                                                                                                                 |
| pSIBR021                                                         | KanR, lacUV5p-Int1-FnCas12a-B1002t, lacUV5p-NT spacer-B1002t, 500 bp homologous arms for EndA   | This study | <a href="https://benchling.com/s/seq-SxuPs17CAIx8DACfcRHC">https://benchling.com/s/seq-SxuPs17CAIx8DACfcRHC</a> |
| pSIBR022                                                         | KanR, lacUV5p-Int2-FnCas12a-B1002t, lacUV5p-NT spacer-B1002t, 500 bp homologous arms for EndA   | This study | <a href="https://benchling.com/s/seq-3q2GgUwX70pVGd86YoZz">https://benchling.com/s/seq-3q2GgUwX70pVGd86YoZz</a> |
| pSIBR023                                                         | KanR, lacUV5p-Int3-FnCas12a-B1002t, lacUV5p-NT spacer-B1002t, 500 bp homologous arms for EndA   | This study | <a href="https://benchling.com/s/seq-BWRXhXnYy2XmfKUuFnNW">https://benchling.com/s/seq-BWRXhXnYy2XmfKUuFnNW</a> |
| pSIBR024                                                         | KanR, lacUV5p-Int4-FnCas12a-B1002t, lacUV5p-NT spacer-B1002t, 500 bp homologous arms for EndA   | This study | <a href="https://benchling.com/s/seq-XZnDqxP8dQWu5CSMU41k">https://benchling.com/s/seq-XZnDqxP8dQWu5CSMU41k</a> |
| pSIBR025                                                         | KanR, lacUV5p-WT FnCas12a-B1002t, lacUV5p-NT spacer-B1002t, 500 bp homologous arms for EndA     | This study | <a href="https://benchling.com/s/seq-IYm1KhIuepDFo3EWjPIR">https://benchling.com/s/seq-IYm1KhIuepDFo3EWjPIR</a> |
| pSIBR026                                                         | KanR, lacUV5p-Int1-FnCas12a-B1002t, lacUV5p-EndA spacer-B1002t                                  | This study | <a href="https://benchling.com/s/seq-dgVlJzUOcRjip42yGGb1">https://benchling.com/s/seq-dgVlJzUOcRjip42yGGb1</a> |
| pSIBR027                                                         | KanR, lacUV5p-Int2-FnCas12a-B1002t, lacUV5p-EndA spacer-B1002t                                  | This study | <a href="https://benchling.com/s/seq-WQU6RFH5WcTmllg3b5hF">https://benchling.com/s/seq-WQU6RFH5WcTmllg3b5hF</a> |
| pSIBR028                                                         | KanR, lacUV5p-Int3-FnCas12a-B1002t, lacUV5p-EndA spacer-B1002t                                  | This study | <a href="https://benchling.com/s/seq-ESDD9SEYlnV9PEXrds52">https://benchling.com/s/seq-ESDD9SEYlnV9PEXrds52</a> |
| pSIBR029                                                         | KanR, lacUV5p-Int4-FnCas12a-B1002t, lacUV5p-EndA spacer-B1002t                                  | This study | <a href="https://benchling.com/s/seq-NaPP64FzauzJVp63HOJz">https://benchling.com/s/seq-NaPP64FzauzJVp63HOJz</a> |
| pSIBR030                                                         | KanR, lacUV5p-WT FnCas12a-B1002t, lacUV5p-EndA spacer-B1002t                                    | This study | <a href="https://benchling.com/s/seq-u2ZsyKxbD4tPqMorvQnJ">https://benchling.com/s/seq-u2ZsyKxbD4tPqMorvQnJ</a> |
| pSIBR031                                                         | KanR, lacUV5p-Int1-FnCas12a-B1002t, lacUV5p-EndA spacer-B1002t, 500 bp homologous arms for EndA | This study | <a href="https://benchling.com/s/seq-bx2nsbDh3fepPVsTN2iY">https://benchling.com/s/seq-bx2nsbDh3fepPVsTN2iY</a> |
| pSIBR032                                                         | KanR, lacUV5p-Int2-FnCas12a-B1002t, lacUV5p-EndA spacer-B1002t, 500 bp homologous arms for EndA | This study | <a href="https://benchling.com/s/seq-CdpX421FfRmfEdZJ9oUG">https://benchling.com/s/seq-CdpX421FfRmfEdZJ9oUG</a> |
| pSIBR033                                                         | KanR, lacUV5p-Int3-FnCas12a-B1002t, lacUV5p-EndA spacer-B1002t, 500 bp homologous arms for EndA | This study | <a href="https://benchling.com/s/seq-9R6r5e6hNU6dBaj3EsiT">https://benchling.com/s/seq-9R6r5e6hNU6dBaj3EsiT</a> |
| pSIBR034                                                         | KanR, lacUV5p-Int4-FnCas12a-B1002t, lacUV5p-EndA spacer-B1002t, 500 bp homologous arms for EndA | This study | <a href="https://benchling.com/s/seq-vfPXGovDiFmGAsHEBT4n">https://benchling.com/s/seq-vfPXGovDiFmGAsHEBT4n</a> |
| pSIBR035                                                         | KanR, lacUV5p-WT FnCas12a-B1002t, lacUV5p-EndA spacer-B1002t, 500 bp homologous arms for EndA   | This study | <a href="https://benchling.com/s/seq-YRxyMOOAVIX5leF9nxBX">https://benchling.com/s/seq-YRxyMOOAVIX5leF9nxBX</a> |
| pSIBR036                                                         | KanR, lacUV5p-Int1-FnCas12a-B1002t, lacUV5p-NT-B1002t, 500 bp homologous arms for FlgM          | This study | <a href="https://benchling.com/s/seq-gDxNAZRAqfBfgvEKvtIS">https://benchling.com/s/seq-gDxNAZRAqfBfgvEKvtIS</a> |
| pSIBR037                                                         | KanR, lacUV5p-Int2-FnCas12a-B1002t, lacUV5p-NT-B1002t, 500 bp homologous arms for FlgM          | This study | <a href="https://benchling.com/s/seq-x4ZSBS8StDdzT1yEifmA">https://benchling.com/s/seq-x4ZSBS8StDdzT1yEifmA</a> |
| pSIBR038                                                         | KanR, lacUV5p-Int3-FnCas12a-B1002t, lacUV5p-NT-B1002t, 500 bp homologous arms for FlgM          | This study | <a href="https://benchling.com/s/seq-JsWtfIN7RWaeK1EqyCv9">https://benchling.com/s/seq-JsWtfIN7RWaeK1EqyCv9</a> |

|                                                      |                                                                                                                                             |                       |                                                                                                                 |
|------------------------------------------------------|---------------------------------------------------------------------------------------------------------------------------------------------|-----------------------|-----------------------------------------------------------------------------------------------------------------|
| pSIBR039                                             | KanR, lacUV5p-Int4-FnCas12a-B1002t, lacUV5p-NT-B1002t, 500 bp homologous arms for FlgM                                                      | This study            | <a href="https://benchling.com/s/seq-xeIvILM9aFbrFN5JGAGs">https://benchling.com/s/seq-xeIvILM9aFbrFN5JGAGs</a> |
| pSIBR040                                             | KanR, lacUV5p-WT FnCas12a-B1002t, lacUV5p-NT-B1002t, 500 bp homologous arms for FlgM                                                        | This study            | <a href="https://benchling.com/s/seq-6knJB0dffuipQURdFqxW">https://benchling.com/s/seq-6knJB0dffuipQURdFqxW</a> |
| pSIBR041                                             | KanR, lacUV5p-Int1-FnCas12a-B1002t, lacUV5p-FlgM spacer-B1002t, 500 bp homologous arms for FlgM                                             | This study            | <a href="https://benchling.com/s/seq-Wb4iXW1Nik2iKe2vPhTL">https://benchling.com/s/seq-Wb4iXW1Nik2iKe2vPhTL</a> |
| pSIBR042                                             | KanR, lacUV5p-Int2-FnCas12a-B1002t, lacUV5p-FlgM spacer-B1002t, 500 bp homologous arms for FlgM                                             | This study            | <a href="https://benchling.com/s/seq-yKGB2QsknL1JcFwahSF">https://benchling.com/s/seq-yKGB2QsknL1JcFwahSF</a>   |
| pSIBR043                                             | KanR, lacUV5p-Int3-FnCas12a-B1002t, lacUV5p-FlgM spacer-B1002t, 500 bp homologous arms for FlgM                                             | This study            | <a href="https://benchling.com/s/seq-50Urz54c5xTwjw316Nes">https://benchling.com/s/seq-50Urz54c5xTwjw316Nes</a> |
| pSIBR044                                             | KanR, lacUV5p-Int4-FnCas12a-B1002t, lacUV5p-FlgM spacer-B1002t, 500 bp homologous arms for FlgM                                             | This study            | <a href="https://benchling.com/s/seq-qByXhASTnuawws86f6Ou">https://benchling.com/s/seq-qByXhASTnuawws86f6Ou</a> |
| pSIBR045                                             | KanR, lacUV5p-WT FnCas12a-B1002t, lacUV5p-FlgM spacer-B1002t, 500 bp homologous arms for FlgM                                               | This study            | <a href="https://benchling.com/s/seq-P8mK0IPbLhXKnuyQsToC">https://benchling.com/s/seq-P8mK0IPbLhXKnuyQsToC</a> |
| <b>SIBR-Cas editing in <i>Flavobacterium IR1</i></b> |                                                                                                                                             |                       |                                                                                                                 |
| pSpyCas9Fb_NT                                        | AmpR ( <i>E. coli</i> ), ErmR ( <i>Flavobacterium</i> ), ompAp-SpyCas9, Hup-ransom spacer sgRNA-ompAt                                       | Carrión et al. (2019) | <a href="https://benchling.com/s/seq-iBmrky1QUKQRxSTF4aIx">https://benchling.com/s/seq-iBmrky1QUKQRxSTF4aIx</a> |
| pSIBR046                                             | SpecR ( <i>E. coli</i> ), ErmR ( <i>Flavobacterium</i> ), ompAp-Int1 FnCas12a-mapt, Hup-NT spacer-ompAt                                     | This study            | <a href="https://benchling.com/s/seq-tryMFuIMBcQowzpUhUox">https://benchling.com/s/seq-tryMFuIMBcQowzpUhUox</a> |
| pSIBR047                                             | SpecR ( <i>E. coli</i> ), ErmR ( <i>Flavobacterium</i> ), ompAp-Int2 FnCas12a-mapt, Hup-NT spacer-ompAt                                     | This study            | <a href="https://benchling.com/s/seq-fuYCpx2KmNQbSW3ruCvt">https://benchling.com/s/seq-fuYCpx2KmNQbSW3ruCvt</a> |
| pSIBR048                                             | SpecR ( <i>E. coli</i> ), ErmR ( <i>Flavobacterium</i> ), ompAp-Int3 FnCas12a-mapt, Hup-NT spacer-ompAt                                     | This study            | <a href="https://benchling.com/s/seq-34dQ4N74oKkn6jYkSxoh">https://benchling.com/s/seq-34dQ4N74oKkn6jYkSxoh</a> |
| pSIBR049                                             | SpecR ( <i>E. coli</i> ), ErmR ( <i>Flavobacterium</i> ), ompAp-Int4 FnCas12a-mapt, Hup-NT spacer-ompAt                                     | This study            | <a href="https://benchling.com/s/seq-SnpUmWz3Tb6iEiB1sKcZ">https://benchling.com/s/seq-SnpUmWz3Tb6iEiB1sKcZ</a> |
| pSIBR050                                             | SpecR ( <i>E. coli</i> ), ErmR ( <i>Flavobacterium</i> ), ompAp-WT FnCas12a-mapt, Hup-NT spacer-ompAt                                       | This study            | <a href="https://benchling.com/s/seq-w5aqQtyTT8YnsNFvnLBf">https://benchling.com/s/seq-w5aqQtyTT8YnsNFvnLBf</a> |
| pSIBR051                                             | SpecR ( <i>E. coli</i> ), ErmR ( <i>Flavobacterium</i> ), ompAp-Int1 FnCas12a-mapt, Hup-NT spacer-ompAt, 1500 bp homologous arms for SprF   | This study            | <a href="https://benchling.com/s/seq-dZi1phxSOvgSfNPC0xVI">https://benchling.com/s/seq-dZi1phxSOvgSfNPC0xVI</a> |
| pSIBR052                                             | SpecR ( <i>E. coli</i> ), ErmR ( <i>Flavobacterium</i> ), ompAp-Int2 FnCas12a-mapt, Hup-NT spacer-ompAt, 1500 bp homologous arms for SprF   | This study            | <a href="https://benchling.com/s/seq-IWXgaNozjrxheoaH3GsO">https://benchling.com/s/seq-IWXgaNozjrxheoaH3GsO</a> |
| pSIBR053                                             | SpecR ( <i>E. coli</i> ), ErmR ( <i>Flavobacterium</i> ), ompAp-Int3 FnCas12a-mapt, Hup-NT spacer-ompAt, 1500 bp homologous arms for SprF   | This study            | <a href="https://benchling.com/s/seq-iOJXCZaLpoLePAGEWyRj">https://benchling.com/s/seq-iOJXCZaLpoLePAGEWyRj</a> |
| pSIBR054                                             | SpecR ( <i>E. coli</i> ), ErmR ( <i>Flavobacterium</i> ), ompAp-Int4 FnCas12a-mapt, Hup-NT spacer-ompAt, 1500 bp homologous arms for SprF   | This study            | <a href="https://benchling.com/s/seq-e67DTZnqKUWgHReK5w9i">https://benchling.com/s/seq-e67DTZnqKUWgHReK5w9i</a> |
| pSIBR055                                             | SpecR ( <i>E. coli</i> ), ErmR ( <i>Flavobacterium</i> ), ompAp-WT FnCas12a-mapt, Hup-NT spacer-ompAt, 1500 bp homologous arms for SprF     | This study            | <a href="https://benchling.com/s/seq-Ef4po4YgCN3MoTmjNk5Z">https://benchling.com/s/seq-Ef4po4YgCN3MoTmjNk5Z</a> |
| pSIBR056                                             | SpecR ( <i>E. coli</i> ), ErmR ( <i>Flavobacterium</i> ), ompAp-Int1 FnCas12a-mapt, Hup-SprF spacer-ompAt, 1500 bp homologous arms for SprF | This study            | <a href="https://benchling.com/s/seq-WkoYYG87CQOlaLzXNI4o">https://benchling.com/s/seq-WkoYYG87CQOlaLzXNI4o</a> |
| pSIBR057                                             | SpecR ( <i>E. coli</i> ), ErmR ( <i>Flavobacterium</i> ), ompAp-Int2 FnCas12a-mapt, Hup-SprF spacer-ompAt, 1500 bp homologous arms for      | This study            | <a href="https://benchling.com/s/seq-Fu0ho5T6eUO2GZOmio0Z">https://benchling.com/s/seq-Fu0ho5T6eUO2GZOmio0Z</a> |

|          |                                                                                                                              |            |                                                                                                                 |
|----------|------------------------------------------------------------------------------------------------------------------------------|------------|-----------------------------------------------------------------------------------------------------------------|
|          | SprF                                                                                                                         |            |                                                                                                                 |
| pSIBR058 | SpecR (E. coli), ErmR (Flavobacterium), ompAp-Int3<br>FnCas12a-mapt, Hup-SprF spacer-ompAt, 1500 bp homologous arms for SprF | This study | <a href="https://benchling.com/s/seq-RlJMyXgvb1x2BflEyaX">https://benchling.com/s/seq-RlJMyXgvb1x2BflEyaX</a>   |
| pSIBR059 | SpecR (E. coli), ErmR (Flavobacterium), ompAp-Int4<br>FnCas12a-mapt, Hup-SprF spacer-ompAt, 1500 bp homologous arms for SprF | This study | <a href="https://benchling.com/s/seq-6Ma0owMHNGMER9Goxp39">https://benchling.com/s/seq-6Ma0owMHNGMER9Goxp39</a> |
| pSIBR060 | SpecR (E. coli), ErmR (Flavobacterium), ompAp-WT<br>FnCas12a-mapt, Hup-SprF spacer-ompAt, 1500 bp homologous arms for SprF   | This study | <a href="https://benchling.com/s/seq-xCL5zkoGDjmQyJ4zMpHm">https://benchling.com/s/seq-xCL5zkoGDjmQyJ4zMpHm</a> |
| pSIBR061 | SpecR (E. coli), ErmR (Flavobacterium), ompAp-Int1<br>FnCas12a-mapt, Hup-NT spacer-ompAt, 1500 bp homologous arms for GldJ   | This study | <a href="https://benchling.com/s/seq-chB8po62TOoKZWxUDUba">https://benchling.com/s/seq-chB8po62TOoKZWxUDUba</a> |
| pSIBR062 | SpecR (E. coli), ErmR (Flavobacterium), ompAp-Int2<br>FnCas12a-mapt, Hup-NT spacer-ompAt, 1500 bp homologous arms for GldJ   | This study | <a href="https://benchling.com/s/seq-3YTUB840ckExcZGvba39">https://benchling.com/s/seq-3YTUB840ckExcZGvba39</a> |
| pSIBR063 | SpecR (E. coli), ErmR (Flavobacterium), ompAp-Int3<br>FnCas12a-mapt, Hup-NT spacer-ompAt, 1500 bp homologous arms for GldJ   | This study | <a href="https://benchling.com/s/seq-xchTm7PHiocBjwZ9SFMp">https://benchling.com/s/seq-xchTm7PHiocBjwZ9SFMp</a> |
| pSIBR064 | SpecR (E. coli), ErmR (Flavobacterium), ompAp-Int4<br>FnCas12a-mapt, Hup-NT spacer-ompAt, 1500 bp homologous arms for GldJ   | This study | <a href="https://benchling.com/s/seq-mBvNACYHsDYyDCxoRYiH">https://benchling.com/s/seq-mBvNACYHsDYyDCxoRYiH</a> |
| pSIBR065 | SpecR (E. coli), ErmR (Flavobacterium), ompAp-WT<br>FnCas12a-mapt, Hup-NT spacer-ompAt, 1500 bp homologous arms for GldJ     | This study | <a href="https://benchling.com/s/seq-xUQNzfObQqriscOUPDRE">https://benchling.com/s/seq-xUQNzfObQqriscOUPDRE</a> |
| pSIBR066 | SpecR (E. coli), ErmR (Flavobacterium), ompAp-Int1<br>FnCas12a-mapt, Hup-GldJ spacer-ompAt, 1500 bp homologous arms for GldJ | This study | <a href="https://benchling.com/s/seq-NzQNSVzLjYTyhEV2ZyR2">https://benchling.com/s/seq-NzQNSVzLjYTyhEV2ZyR2</a> |
| pSIBR067 | SpecR (E. coli), ErmR (Flavobacterium), ompAp-Int2<br>FnCas12a-mapt, Hup-GldJ spacer-ompAt, 1500 bp homologous arms for GldJ | This study | <a href="https://benchling.com/s/seq-U85vC5BwueDjpfqOL2oE">https://benchling.com/s/seq-U85vC5BwueDjpfqOL2oE</a> |
| pSIBR068 | SpecR (E. coli), ErmR (Flavobacterium), ompAp-Int3<br>FnCas12a-mapt, Hup-GldJ spacer-ompAt, 1500 bp homologous arms for GldJ | This study | <a href="https://benchling.com/s/seq-HNAiHbFECKxxe3t9PdWk">https://benchling.com/s/seq-HNAiHbFECKxxe3t9PdWk</a> |
| pSIBR069 | SpecR (E. coli), ErmR (Flavobacterium), ompAp-Int4<br>FnCas12a-mapt, Hup-GldJ spacer-ompAt, 1500 bp homologous arms for GldJ | This study | <a href="https://benchling.com/s/seq-WZi2dhVTrALGUiDMmljs">https://benchling.com/s/seq-WZi2dhVTrALGUiDMmljs</a> |
| pSIBR070 | SpecR (E. coli), ErmR (Flavobacterium), ompAp-WT<br>FnCas12a-mapt, Hup-GldJ spacer-ompAt, 1500 bp homologous arms for GldJ   | This study | <a href="https://benchling.com/s/seq-TQHsQtPuiTAqZp0P2XwE">https://benchling.com/s/seq-TQHsQtPuiTAqZp0P2XwE</a> |

**Table S2.** Oligonucleotides used in this study. The spacer moieties of the crRNA used in this study are highlighted with red.

| Oligo ID | Sequence (5'to 3')                               | Description                                        |
|----------|--------------------------------------------------|----------------------------------------------------|
| BG22591  | CGGCGAGGATGAGTGCACAG                             | cPCR for LacZ KO in E. coli, forward               |
| BG22592  | GGGAAGGCGACTGGAGTGCC                             | cPCR for LacZ KO in E. coli, reverse               |
| BG21027  | CGAAGTGATGGCCAAGCTGGG                            | cPCR for EndA KO in P. putida, forward             |
| BG21028  | CTGGCGATGGTAGCGATGACC                            | cPCR for EndA KO in P. putida, reverse             |
| BG21663  | CGTGGACGGTATTTCGTGCCG                            | cPCR for FlgM KO in P. putida, forward             |
| BG21664  | GGTTGCGGGGCATCGGATTC                             | cPCR for FlgM KO in P. putida, reverse             |
| BG18323  | AATAGACGCTTTAGAGCTAC                             | cPCR for SprF KO in Flavobacterium IR1, forward    |
| BG18324  | CTTAGGGCAATAATTAGTGC                             | cPCR for SprF KO in Flavobacterium IR1, reverse    |
| BG22050  | ACAATTCCTGTGTTCGAGGC                             | cPCR for GldJ KO in Flavobacterium IR1, forward    |
| BG22051  | CACAGACAAAAGCTGGAAGG                             | cPCR for GldJ KO in Flavobacterium IR1, reverse    |
| BG20154  | AGAAGACATAGATCAACGTCGTGACTGGGAAAAGTCTATGCTTCA    | LacZ spacer insertion through Golden Gate, forward |
| BG20155  | TGAAGACATAGACTTTTCCAGTCACGACGTTGATCTATGTCTTCT    | LacZ spacer insertion through Golden Gate, reverse |
| BG20271  | AGAAGACATAGATGGCTGGCTACCAGAACAACGGTCTATGCTTCA    | EndA spacer insertion through Golden Gate, forward |
| BG20272  | TGAAGACATAGACCGTTGTCTGGTAGCCAGCCATCTATGTCTTCT    | EndA spacer insertion through Golden Gate, reverse |
| BG21614  | AGAAGACATAGATATTTGGAAGCCCAGCGCTGAGTCTATGCTTCA    | FlgM spacer insertion through Golden Gate, forward |
| BG21615  | TGAAGACATAGACTCAGCGCTGGGCTTCGAAATATCTATGTCTTCT   | FlgM spacer insertion through Golden Gate, reverse |
| BG17871  | AGGTTCATAGATGATATTCTTACCAGGTTATGGTCTAAGAGACCA    | SprF spacer insertion through Golden Gate, forward |
| BG17872  | TGGTCTCTTAGACCATAACCTGGTAAGAATATCATCTATGAGACCT   | SprF spacer insertion through Golden Gate, reverse |
| BG22036  | AGGTTCATAGATCCCATAGTAAACGTACCTCCGTCTAAGAGACCA    | GldJ spacer insertion through Golden Gate, forward |
| BG22037  | TGGTCTCTTAGACGGAGGTACGTTTACTATGGGATCTATGAGACCT   | GldJ spacer insertion through Golden Gate, reverse |
| BG20140  | AGCTGTTTCCTGTGTGAAAT                             | Upstream homology arm for LacZ, forward            |
| BG20644  | TAACGCTGCCGCGCCGGTAAGGCATCGTTCCTCCACTGCGAT       | Upstream homology arm for LacZ, reverse            |
| BG20643  | TTAATTGGACCGCGTCCGACCAACACAGCCAAACATCCG          | Downstream homology arm for LacZ, forward          |
| BG20139  | ATTCACACAGGAAACAGCTTAATAACCGGCAGGCCATG           | Downstream homology arm for LacZ, reverse          |
| BG20266  | CGTCTCAGCGCAGTCAATCTTCCTTCG                      | Upstream homology arm for EndA, forward            |
| BG20267  | CGTCTCAGTAGAGCAAAGAGCTGCACGGAT                   | Upstream homology arm for EndA, reverse            |
| BG20264  | CGTCTCATCCGAACCAGTAAAAGTGCGCCG                   | Downstream homology arm for EndA, forward          |
| BG20265  | CGTCTCAGCGCTCCTCAGGCCAGCGTTTGTGTA                | Downstream homology arm for EndA, reverse          |
| BG21610  | CGTCTCATCCGACTTTTCCGCGACGTGGTG                   | Upstream homology arm for FlgM, forward            |
| BG21611  | CGTCTCAACGGGATCAGAAACCTCTGGGTATTTGG              | Upstream homology arm for FlgM, reverse            |
| BG21612  | CGTCTCACCGTACGGCGCGCTGACTTC                      | Downstream homology arm for FlgM, forward          |
| BG21613  | CGTCTCAGTAGCGACACACGCAAGTAACGGC                  | Downstream homology arm for FlgM, reverse          |
| BG17933  | CCTCGAGATCTCCATGGACGCAACTAGACGTTACCAATGC         | Upstream homology arm for SprF, forward            |
| BG17934  | CTTAAATGATCTATTTTCGTTGGGGCAATCAATTGTTATC         | Upstream homology arm for SprF, reverse            |
| BG17935  | ACGAAAAATAGGATCATTTAAG                           | Downstream homology arm for SprF, forward          |
| BG17936  | CCTCTAGAGTCGACGTCACGGTAATTTAGTCCAAAATGGC         | Downstream homology arm for SprF, reverse          |
| BG21734  | AGTTGGGGCCTCGAGATCTCCATGGACGGAACCTAAATTTGCTTCCCG | Upstream homology arm for GldJ, forward            |
| BG21735  | TGTTACAATTAATATATTGACTATTCTTAGGTGATAAATTTAGG     | Upstream homology arm for GldJ, reverse            |
| BG21736  | CAATATATTTAATTGTAACAAAAGCCC                      | Downstream homology arm for GldJ, forward          |
| BG21737  | CCGGGATCCTCTAGAGTCGACGTCACGCCTCGTGAAGTGA         | Downstream homology arm for GldJ, reverse          |

|        |                                                      |                                                                              |
|--------|------------------------------------------------------|------------------------------------------------------------------------------|
|        | TTTATC                                               |                                                                              |
| BG5039 | GATCTTAAGGATGTTTTGTTGGGTTAATTGAGGCCTGAGTATA<br>AGGTG | Forward primer to construct pEA001 [-7M]                                     |
| BG5040 | TGACTGCAGAATATTTAAACGGTAGCATTATGTTTCAGATAAGG<br>TCG  | Reverse primer to construct WT 3' exonic<br>flanking region of pEA001 series |
| BG5206 | GATCTTAAGGATGTTTTCTCAGGTTAATTGAGGCCTGAGTATA<br>AGGTG | Forward primer to construct pEA001 [PPP]                                     |
| BG5207 | GATCTTAAGGATGTTTTCTCGGGTTAATTGAGGCCTGAGTATA<br>AGGTG | Forward primer to construct pEA001 [PPW]                                     |
| BG5208 | GATCTTAAGGATGTTTTCTCTGGTTAATTGAGGCCTGAGTATA<br>AGGTG | Forward primer to construct pEA001 [PPM]                                     |
| BG5209 | GATCTTAAGGATGTTTTCTTAGGTTAATTGAGGCCTGAGTATA<br>AGGTG | Forward primer to construct pEA001 [PWP]                                     |
| BG5210 | GATCTTAAGGATGTTTTCTTGGGTTAATTGAGGCCTGAGTATA<br>AGGTG | Forward primer to construct pEA001 [PWW]                                     |
| BG5211 | GATCTTAAGGATGTTTTCTTTGGTTAATTGAGGCCTGAGTATA<br>AGGTG | Forward primer to construct pEA001 [PWM]                                     |
| BG5212 | GATCTTAAGGATGTTTTCTGAGGTTAATTGAGGCCTGAGTATA<br>AGGTG | Forward primer to construct pEA001 [PMP]                                     |
| BG5213 | GATCTTAAGGATGTTTTCTGGGGTTAATTGAGGCCTGAGTATA<br>AGGTG | Forward primer to construct pEA001 [PMW]                                     |
| BG5214 | GATCTTAAGGATGTTTTCTGTGGTTAATTGAGGCCTGAGTATA<br>AGGTG | Forward primer to construct pEA001 [PMM]                                     |
| BG5215 | GATCTTAAGGATGTTTTCCAGGTTAATTGAGGCCTGAGTATA<br>AGGTG  | Forward primer to construct pEA001 [MPP]                                     |
| BG5216 | GATCTTAAGGATGTTTTCCCGGGTTAATTGAGGCCTGAGTATA<br>AGGTG | Forward primer to construct pEA001 [MPW]                                     |
| BG5217 | GATCTTAAGGATGTTTTCCCTGGTTAATTGAGGCCTGAGTATA<br>AGGTG | Forward primer to construct pEA001 [MPM]                                     |
| BG5218 | GATCTTAAGGATGTTTTCTTAGGTTAATTGAGGCCTGAGTATA<br>AGGTG | Forward primer to construct pEA001 [MPW]                                     |
| BG5219 | GATCTTAAGGATGTTTTCTGGGTTAATTGAGGCCTGAGTATA<br>AGGTG  | Forward primer to construct pEA001 [MWW]                                     |
| BG5220 | GATCTTAAGGATGTTTTCTTGGTTAATTGAGGCCTGAGTATA<br>AGGTG  | Forward primer to construct pEA001 [MWM]                                     |
| BG5221 | GATCTTAAGGATGTTTTCCGAGGTTAATTGAGGCCTGAGTATA<br>AGGTG | Forward primer to construct pEA001 [MMP]                                     |
| BG5222 | GATCTTAAGGATGTTTTCCGGGGTTAATTGAGGCCTGAGTATA<br>AGGTG | Forward primer to construct pEA001 [MMW]                                     |
| BG5223 | GATCTTAAGGATGTTTTCCGTGGTTAATTGAGGCCTGAGTATA<br>AGGTG | Forward primer to construct pEA001 [MMM]                                     |
| BG5304 | GATCTTAAGGATGTTCTTTGGGTTAATTGAGGCCTGAGTATA<br>AGGTG  | Forward primer to construct pEA001 [-7W]                                     |
| BG5305 | TGACTGCAGAATATTTAAACGGGAGCATTATGTTTCAGATAAGG<br>TCG  | Reverse primer to construct pEA001 [296P]                                    |
| BG5306 | TGACTGCAGAATATTTAAACGGAAGCATTATGTTTCAGATAAGG<br>TCG  | Reverse primer to construct pEA001 [296W]                                    |
